# Supplementary material for: The role of hypertension in bone mineral density among males older than 50 years and postmenopausal females: evidence from the US National Health and Nutrition Examination Survey, 2005–2010
Source: PubMed Central journal article supplement (PMC10311208; doi:10.3389/fpubh.2023.1142155), 2023-06-15
Supplement: Table_1.pdf [file Table_1.pdf]

sTable 1 Mean BMD (g/cm<sup>2</sup>) according to the type of hypertension by excluding participants with drugs used for hypertension in NHANES 2005 to 2010

|                                       | Control       | Any hypertension | <i>p</i> -value |
|---------------------------------------|---------------|------------------|-----------------|
| Femur neck BMD (g/cm <sup>2</sup> )   |               |                  |                 |
| Male                                  |               |                  |                 |
| Model 1                               | 0.809 ± 0.004 | 0.820 ± 0.006    | 0.115           |
| Model 2                               | 0.812 ± 0.004 | 0.817 ± 0.006    | 0.549           |
| Model 3                               | 0.812 ± 0.004 | 0.818 ± 0.006    | 0.404           |
| Female                                |               |                  |                 |
| Model 1                               | 0.738 ± 0.005 | 0.726 ± 0.005    | 0.115           |
| Model 2                               | 0.731 ± 0.005 | 0.735 ± 0.006    | 0.573           |
| Model 3                               | 0.730 ± 0.005 | 0.736 ± 0.006    | 0.400           |
| Lumbar spine BMD (g/cm <sup>2</sup> ) |               |                  |                 |
| Male                                  |               |                  |                 |
| Model 1                               | 1.039 ± 0.005 | 1.081 ± 0.006    | <0.001          |
| Model 2                               | 1.047 ± 0.005 | 1.071 ± 0.007    | 0.008           |
| Model 3                               | 1.046 ± 0.005 | 1.072 ± 0.006    | 0.002           |
| Female                                |               |                  |                 |
| Model 1                               | 0.943 ± 0.007 | 0.953 ± 0.006    | 0.199           |
| Model 2                               | 0.938 ± 0.006 | 0.959 ± 0.006    | 0.016           |
| Model 3                               | 0.937 ± 0.006 | 0.960 ± 0.006    | 0.009           |

Values are the means ± standard error by weighted general linear models.

Model 1: adjusted without any variables.

Model 2: adjusted for age, race/ethnicity, and BMI.

Model 3: adjusted for age, race/ethnicity, marriage, BMI, family PIR, education, recent smoking status, physical activity, total calcium, arthritis, congestive heart failure, coronary heart disease, angina/angina pectoris, heart attack, and stroke.

sTable 2 Multivariate linear regression of association between hypertension and BMD in males and females after excluding participants with drugs used for hypertension

|                                    | Male    |               |        | Female  |               |       |
|------------------------------------|---------|---------------|--------|---------|---------------|-------|
|                                    | $\beta$ | 95%CI         | p      | $\beta$ | 95%CI         | p     |
| Femur neck BMD g/cm <sup>2</sup>   |         |               |        |         |               |       |
| Model 1                            | 0.011   | -0.003, 0.025 | 0.115  | -0.012  | -0.027, 0.003 | 0.115 |
| Model 2                            | 0.005   | -0.011, 0.020 | 0.549  | 0.004   | -0.010, 0.018 | 0.573 |
| Model 3                            | 0.006   | -0.009, 0.002 | 0.404  | 0.006   | -0.008, 0.020 | 0.400 |
| Lumbar spine BMD g/cm <sup>2</sup> |         |               |        |         |               |       |
| Model 1                            | 0.043   | 0.028, 0.058  | <0.001 | 0.010   | -0.006, 0.026 | 0.199 |
| Model 2                            | 0.024   | 0.006, 0.041  | 0.008  | 0.020   | 0.004, 0.037  | 0.016 |
| Model 3                            | 0.026   | 0.010, 0.042  | 0.002  | 0.023   | 0.006, 0.040  | 0.009 |

Model 1: adjusted without any variables.

Model 2: adjusted for age, race/ethnicity, and BMI.

Model 3: adjusted for age, race/ethnicity, marriage, BMI, family PIR, education, recent smoking status, physical activity, total calcium, arthritis, congestive heart failure, coronary heart disease, angina/angina pectoris, heart attack, and stroke.

sTable 3 Mean BMD (g/cm<sup>2</sup>) according to the type of hypertension by excluding participants with thyroid problems in NHANES 2005 to 2010

|                                       | Control       | Any hypertension | <i>p</i> -value |
|---------------------------------------|---------------|------------------|-----------------|
| Femur neck BMD (g/cm <sup>2</sup> )   |               |                  |                 |
| Male                                  |               |                  |                 |
| Model 1                               | 0.810 ± 0.004 | 0.822 ± 0.005    | 0.062           |
| Model 2                               | 0.814 ± 0.004 | 0.818 ± 0.005    | 0.595           |
| Model 3                               | 0.813 ± 0.004 | 0.818 ± 0.005    | 0.470           |
| Female                                |               |                  |                 |
| Model 1                               | 0.742 ± 0.006 | 0.732 ± 0.006    | 0.243           |
| Model 2                               | 0.734 ± 0.005 | 0.742 ± 0.006    | 0.288           |
| Model 3                               | 0.733 ± 0.005 | 0.742 ± 0.006    | 0.212           |
| Lumbar spine BMD (g/cm <sup>2</sup> ) |               |                  |                 |
| Male                                  |               |                  |                 |
| Model 1                               | 1.039 ± 0.006 | 1.081 ± 0.006    | <0.001          |
| Model 2                               | 1.049 ± 0.005 | 1.070 ± 0.006    | 0.012           |
| Model 3                               | 1.048 ± 0.005 | 1.072 ± 0.006    | 0.005           |
| Female                                |               |                  |                 |
| Model 1                               | 0.941 ± 0.007 | 0.957 ± 0.007    | 0.119           |
| Model 2                               | 0.936 ± 0.007 | 0.963 ± 0.006    | 0.004           |
| Model 3                               | 0.931 ± 0.007 | 0.964 ± 0.006    | 0.003           |

Values are the means ± standard error by weighted general linear models.

Model 1: adjusted without any variables.

Model 2: adjusted for age, race/ethnicity, and BMI.

Model 3: adjusted for age, race/ethnicity, marriage, BMI, family PIR, education, recent smoking status, physical activity, total calcium, arthritis, congestive heart failure, coronary heart disease, angina/angina pectoris, heart attack, and stroke.

sTable 4 Multivariate linear regression of association between hypertension and BMD in males and females after excluding participants with thyroid problems

|                                    | Male    |               |        | Female  |               |       |
|------------------------------------|---------|---------------|--------|---------|---------------|-------|
|                                    | $\beta$ | 95%CI         | p      | $\beta$ | 95%CI         | p     |
| Femur neck BMD g/cm <sup>2</sup>   |         |               |        |         |               |       |
| Model 1                            | 0.012   | -0.001, 0.025 | 0.062  | -0.010  | -0.026, 0.007 | 0.243 |
| Model 2                            | 0.004   | -0.011, 0.019 | 0.595  | 0.008   | -0.007, 0.022 | 0.288 |
| Model 3                            | 0.005   | -0.010, 0.019 | 0.470  | 0.009   | -0.006, 0.024 | 0.212 |
| Lumbar spine BMD g/cm <sup>2</sup> |         |               |        |         |               |       |
| Model 1                            | 0.042   | 0.028, 0.056  | <0.001 | 0.016   | -0.006, 0.026 | 0.119 |
| Model 2                            | 0.021   | 0.005, 0.037  | 0.012  | 0.027   | 0.009, 0.045  | 0.004 |
| Model 3                            | 0.023   | 0.008, 0.039  | 0.005  | 0.029   | 0.011, 0.048  | 0.003 |

Model 1: adjusted without any variables.

Model 2: adjusted for age, race/ethnicity, and BMI.

Model 3: adjusted for age, race/ethnicity, marriage, BMI, family PIR, education, recent smoking status, physical activity, total calcium, arthritis, congestive heart failure, coronary heart disease, angina/angina pectoris, heart attack, and stroke.

sTable 5 Mean BMD (g/cm<sup>2</sup>) according to the type of hypertension by excluding participants with taking prednisone or cortisone daily in NHANES 2005 to 2010

|                                       | Control       | Any hypertension | <i>p</i> -value |
|---------------------------------------|---------------|------------------|-----------------|
| Femur neck BMD (g/cm <sup>2</sup> )   |               |                  |                 |
| Male                                  |               |                  |                 |
| Model 1                               | 0.811 ± 0.003 | 0.821 ± 0.005    | 0.117           |
| Model 2                               | 0.815 ± 0.004 | 0.818 ± 0.005    | 0.677           |
| Model 3                               | 0.814 ± 0.004 | 0.818 ± 0.005    | 0.556           |
| Female                                |               |                  |                 |
| Model 1                               | 0.742 ± 0.006 | 0.732 ± 0.006    | 0.954           |
| Model 2                               | 0.734 ± 0.005 | 0.742 ± 0.006    | 0.116           |
| Model 3                               | 0.733 ± 0.005 | 0.742 ± 0.006    | 0.110           |
| Lumbar spine BMD (g/cm <sup>2</sup> ) |               |                  |                 |
| Male                                  |               |                  |                 |
| Model 1                               | 1.039 ± 0.005 | 1.082 ± 0.005    | <0.001          |
| Model 2                               | 1.049 ± 0.005 | 1.071 ± 0.006    | 0.006           |
| Model 3                               | 1.048 ± 0.005 | 1.072 ± 0.006    | 0.003           |
| Female                                |               |                  |                 |
| Model 1                               | 0.941 ± 0.007 | 0.957 ± 0.007    | 0.016           |
| Model 2                               | 0.936 ± 0.007 | 0.963 ± 0.006    | 0.003           |
| Model 3                               | 0.935 ± 0.007 | 0.964 ± 0.006    | 0.002           |

Values are the means ± standard error by weighted general linear models.

Model 1: adjusted without any variables.

Model 2: adjusted for age, race/ethnicity, and BMI.

Model 3: adjusted for age, race/ethnicity, marriage, BMI, family PIR, education, recent smoking status, physical activity, total calcium, arthritis, congestive heart failure, coronary heart disease, angina/angina pectoris, heart attack, and stroke.

sTable 6 Multivariate linear regression of association between hypertension and BMD in males and females after excluding participants taking prednisone or cortisone daily

|                                    | Male    |               |        | Female  |               |       |
|------------------------------------|---------|---------------|--------|---------|---------------|-------|
|                                    | $\beta$ | 95%CI         | p      | $\beta$ | 95%CI         | p     |
| Femur neck BMD g/cm <sup>2</sup>   |         |               |        |         |               |       |
| Model 1                            | 0.010   | -0.003, 0.023 | 0.117  | 0       | -0.014, 0.013 | 0.954 |
| Model 2                            | 0.003   | -0.011, 0.017 | 0.677  | 0.010   | -0.003, 0.023 | 0.116 |
| Model 3                            | 0.004   | -0.010, 0.018 | 0.556  | 0.011   | -0.003, 0.024 | 0.110 |
| Lumbar spine BMD g/cm <sup>2</sup> |         |               |        |         |               |       |
| Model 1                            | 0.043   | 0.030, 0.056  | <0.001 | 0.022   | 0.004, 0.040  | 0.016 |
| Model 2                            | 0.022   | 0.007, 0.037  | 0.006  | 0.027   | 0.010, 0.045  | 0.003 |
| Model 3                            | 0.023   | 0.009, 0.038  | 0.003  | 0.030   | 0.011, 0.048  | 0.002 |

Model 1: adjusted without any variables.

Model 2: adjusted for age, race/ethnicity, and BMI.

Model 3: adjusted for age, race/ethnicity, marriage, BMI, family PIR, education, recent smoking status, physical activity, total calcium, arthritis, congestive heart failure, coronary heart disease, angina/angina pectoris, heart attack, and stroke.
